# Supplementary material
Source: PubMed Central journal article supplement (PMC3346401)
Supplement: supp_78.11.3855_AEM-AEM07771-11-s01.pdf [file supp_78.11.3855_AEM-AEM07771-11-s01.pdf]

Supplemental Table 1. Primers used in this study

| Name                | Gene targeted | Oligonucleotide sequence (5' → 3')         |
|---------------------|---------------|--------------------------------------------|
| Arc2-RT sense       | <i>arc2</i>   | GGTTTCGCTCGGGGAGG                          |
| Arc2-RT antisense   | <i>arc2</i>   | GGGCTTTGGCTGAGAAGAGA                       |
| Cyt19-RT sense      | <i>cyt19</i>  | TAAGCTGTGGAAATCCCCTC                       |
| Cyt19-RT antisense  | <i>cyt19</i>  | AGCTCGATCATTAGAAGGTTAGG                    |
| AcrA-RT sense       | <i>acrA</i>   | AGTGAGGTTTGAGACGCTCC                       |
| AcrA-RT antisense   | <i>acrA</i>   | CAGGCCAAACCAAGCATGAA                       |
| Pho87-RT sense      | <i>pho87</i>  | TCCTGCTTGTGTTTGGCATT                       |
| Pho87-RT antisense  | <i>pho87</i>  | GAGGAATAACCTCTGTAGCCCA                     |
| GlpF-RT sense       | <i>glpF</i>   | TGAAGTGGGGGAAGCGG                          |
| GlpF-RT antisense   | <i>glpF</i>   | TTCATCGCTCATTGCGGTC                        |
| GstA-RT sense       | <i>gstA</i>   | CCGGACAATGGCAGCATCAG                       |
| GstA-RT antisense   | <i>gstA</i>   | GCATGTTCAAGCACGCTCCA                       |
| Tef1-RT sense       | <i>TEF1</i>   | AGTCCGAGCGTGAGCGTGGT                       |
| Tef1-RT antisense   | <i>TEF1</i>   | GGTGACCGGGGGCGTCAATG                       |
| AcrA Gate 1         | <i>acrA</i>   | CACCCAAAAGTAACAAGCAACGGC                   |
| AcrA Gate 2         | <i>acrA</i>   | CTTCCGTATCGGTGCGGGT                        |
| AcrA Gate 3         | <i>acrA</i>   | AAAACAAGAGACATCAGC                         |
| AcrA Gate 4         | <i>acrA</i>   | TCATGGCTGGGCTATTGGTT                       |
| AcrA Gate 5         | <i>acrA</i>   | GATTTTGCACTCTGCACCCC                       |
| HY                  | <i>hph</i>    | GGATGCCTCCGCTCGAAGTA                       |
| YG                  | <i>hph</i>    | CGTTGCAAGACCTGCCTGAA                       |
| Phleo sense         | <i>ble</i>    | GTTTTCCCAGTCACGACGTT                       |
| Phleo antisense     | <i>ble</i>    | TTTCACACAGGAAACAGCTATGAC                   |
| GFP-F               | <i>gfp</i>    | ATATCCATGGATATCGCGCCGCGATGGTGAGCAAGGGCG    |
| GFP-R               | <i>gfp</i>    | AGCAGCACTAGTTTACTTGTACAGCTCGTCCATGCCG      |
| AcrA-F              | <i>acrA</i>   | ACCATGGATATCATGGCGCACGAAGAGAAGG            |
| AcrA-R              | <i>acrA</i>   | AAAATCGCGCCGCAGGGGTCCACTTCTGT              |
| Phleo-EcoRI         | <i>ble</i>    | ATCTGCAGAATTCGCCCTCCTCAGG                  |
| Phleo-SacI          | <i>ble</i>    | TTGTGCTGGAGCTCGCCCTCCTCAGG                 |
| AcrA-Bios sense     | <i>acrA</i>   | GAGCTCTGTACAGTGACCGGTGGTGCCAAGAGTGGTGCCAAG |
| AcrA-Bios antisense | <i>acrA</i>   | CACCATCGCGCCGCGATATCCTTGCGAAGTATTCT        |
