# Supplementary material
Source: PubMed Central journal article supplement (PMC3346401)

Supplemental Figure 1. Phylogenetic analysis of arsenic transporters

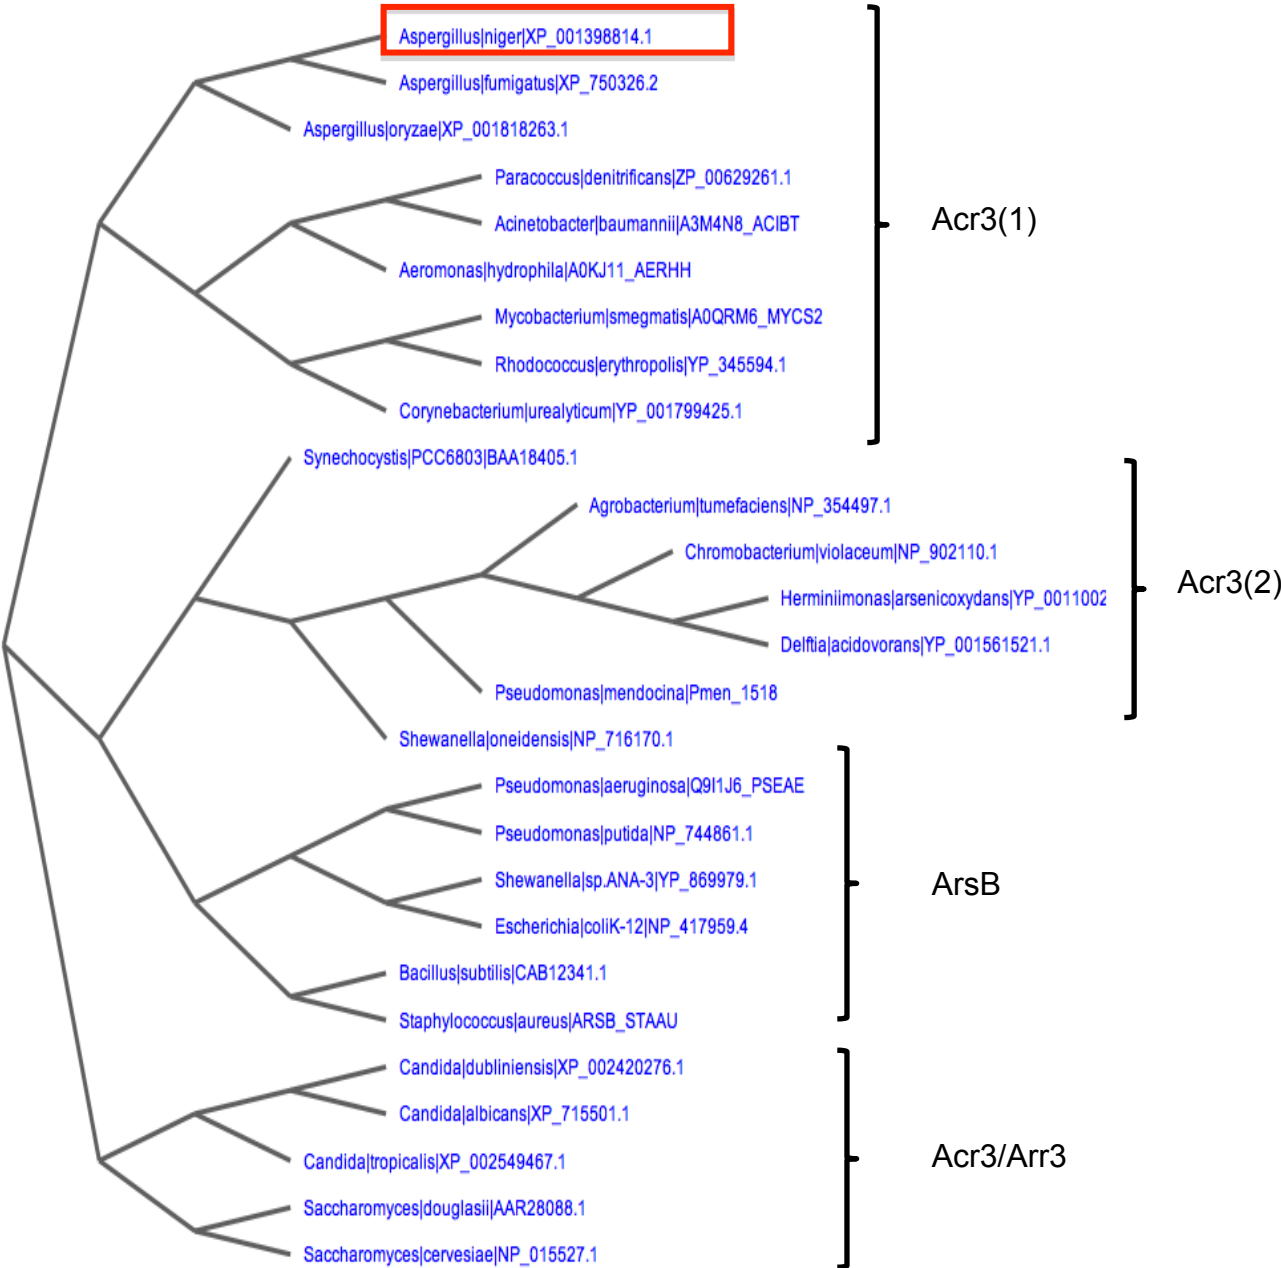

Supplement: supp_78.11.3855_AEM-AEM07771-11-s02.pdf [file supp_78.11.3855_AEM-AEM07771-11-s02.pdf]
